# Supplementary material for: Museomics reveals genetic swamping over 200 years of a marginal native population of the northern forest tree Acer campestre by non-native genotypes introduced as ornamentals
Source: Research Square preprint supplement (doi:10.21203/rs.3.rs-7633213/v1), 2025-10-15
Supplement: Supplementary file 1 [file ad413b4434cedadc257481a4.xlsx]

## Sheet: Scania Historical
																																		Subsampling even sampling size, uneven time periods.
barcode	Aop116		Aop122		Aop132		Aop943R		As tetra		MAP40		MAP9R		AM116		AM118		SM14		SM29		SM60		year	Loc.Abr.	Country	Locality	Q1	Q2	Q3	y	x	Pop	1820	1830	1840	1850	1860	1870	1880	1890	1900	1910	1920	1930	1940	1950	1960
80067984687	110	116	180	180	124	141	144	152	231	235	132	138	105	105	245	247	148	154	88	126	296	296	237	238	1820	SE-Lu	Sweden	Lund	0.0126	0.9668	0.0206	55.6995	13.1973	1
80067984572	112	129	166	180	135	141	138	150	235	235	112	148	112	112	243	251	156	162	78	78	290	290	242	244	1823	SE-Si	Sweden	Silversborg	0.7892	0.0564	0.1544	55.4842	13.2526	1
80067984574	114	116	166	180	135	135	138	150	231	231	110	124	105	105	243	253	148	162	78	88	293	293	236	238	1823	SE-Br	Sweden	Brännemölla	0.0257	0.1513	0.823	55.4986	13.2573	1
80067984685	112	112	180	180	135	135	140	140	231	231	108	138	105	105	249	253	150	162	78	82	290	290	242	244	1836	SE-Si	Sweden	Silversborg	0.8275	0.0299	0.1426	55.4842	13.2526	1
80067984568	112	112	166	180	124	135	138	138	231	235	148	148	105	105	237	239	154	156	82	106	290	296	237	238	1840	SE-Br	Sweden	Brännemölla	0.1187	0.1192	0.762	55.4986	13.2573	1
80067984582	112	112	180	180	124	135	138	149	231	235	148	148	105	112	237	239	154	156	82	106	293	293	236	238	1840	SE-Br	Sweden	Brännemölla	0.0369	0.0387	0.9244	55.4986	13.2573	1
80067984587	114	116	180	180	135	135	152	154	231	231	132	148	105	105	237	253	148	162	80	114	293	293	236	238	1840	SE-Br	Sweden	Brännemölla	0.0273	0.0183	0.9544	55.4986	13.2573	1
80067984588	112	112	180	180	135	137	138	149	231	231	112	148	105	105	237	253	148	162	78	94	290	290	236	238	1840	SE-Br	Sweden	Brännemölla	0.0169	0.0157	0.9674	55.4986	13.2573	1
80067984611	110	114	166	178	124	135	152	152	235	235	130	130	105	109	237	245	148	156	78	82	290	293	237	238	1840	SE-Br	Sweden	Brännemölla	0.0284	0.0813	0.8903	55.4986	13.2573	1
80067984709	112	114	166	180	124	135	152	154	231	235	132	148	105	112	245	249	150	156	86	94	293	293	236	238	1840	SE-Br	Sweden	Brännemölla	0.0116	0.0204	0.968	55.4986	13.2573	1
80067984581	112	129	180	180	135	135	138	138	235	235	112	148	105	112	237	239	150	162	78	114	290	290	237	238	1848	SE-Kp	Sweden	Krapperup	0.3469	0.0191	0.634	56.2499	12.5335	1
80067984664	112	112	180	180	135	137	144	152	236	236	148	148	105	105	237	253	148	162	78	94	290	290	237	238	1854	SE-Br	Sweden	Brännemölla	0.0157	0.0305	0.9538	55.4986	13.2573	1
80067984612	103	110	180	180	124	124	138	146	236	236	168	168	107	107	249	253	150	162	92	96	293	293	237	238	1856	SE-He	Sweden	Helsingborg	0.0136	0.7693	0.2171	56.0523	12.7607	1
80067984672	0	0	180	180	139	141	138	149	231	235	132	148	107	107	237	245	148	156	92	96	293	293	242	244	1856	SE-He	Sweden	Helsingborg	0.0504	0.9004	0.0492	56.0523	12.7607	1
80067984717	103	116	166	180	124	135	154	154	236	236	112	112	119	119	249	253	148	170	78	82	290	293	237	238	1856	SE-He	Sweden	Helsingborg	0.0118	0.0498	0.9384	56.0523	12.7607	1
80067984562	112	114	180	180	126	128	142	142	235	235	112	148	107	107	239	239	148	154	80	114	290	290	238	238	1858	SE-Sv	Sweden	Svedala	0.963	0.0164	0.0206	55.5268	13.2204	1
80067984573	112	114	180	180	124	133	138	154	231	231	112	153	105	112	237	237	148	156	106	114	290	290	238	238	1858	SE-Sv	Sweden	Svedala	0.1373	0.0809	0.7818	55.5268	13.2204	1
80067984575	103	112	166	166	0	0	140	140	231	235	133	133	119	119	237	259	148	156	106	114	290	290	238	238	1858	SE-Ag	Sweden	Aggarp	0.3674	0.6082	0.0244	55.4958	13.2335	1
80067984658	112	116	180	180	124	124	154	154	231	231	112	132	105	112	237	253	148	162	78	94	290	290	237	238	1858	SE-Ag	Sweden	Aggarp	0.0098	0.0119	0.9783	55.4958	13.2335	1
80067984663	118	118	180	180	124	133	140	154	231	236	150	153	105	112	245	249	150	156	86	106	290	290	238	238	1858	SE-Sv	Sweden	Svedala	0.2992	0.3825	0.3182	55.5268	13.2204	1
80067984666	116	116	166	180	126	133	142	142	231	231	150	150	113	114	239	257	148	156	78	114	293	293	237	238	1858	SE-Si	Sweden	Silversborg	0.97	0.0152	0.0148	55.4842	13.2526	2
80067984701	112	114	180	180	124	124	152	154	235	235	112	112	105	112	237	237	148	156	102	106	290	290	238	238	1858	SE-Sv	Sweden	Svedala	0.0167	0.0236	0.9597	55.5268	13.2204	2
80067984549	124	129	166	180	128	133	138	146	231	235	112	144	113	114	245	259	150	150	82	96	293	293	238	238	1859	SE-Si	Sweden	Silversborg	0.8252	0.153	0.0218	55.4842	13.2526	2
80067984702	112	112	166	180	135	141	138	138	231	231	112	150	105	105	237	245	148	156	78	114	290	293	237	238	1859	SE-Si	Sweden	Silversborg	0.6963	0.0208	0.2829	55.4842	13.2526	2
80067984577	112	129	166	180	124	133	154	159	235	235	144	148	105	112	237	237	148	156	102	112	293	293	238	238	1860	SE-Sv	Sweden	Svedala	0.14	0.5992	0.2608	55.5268	13.2204	2
80067984661	102	112	166	166	124	133	138	154	231	236	112	132	105	105	237	237	148	156	102	102	290	293	236	238	1860	SE-Sv	Sweden	Svedala	0.0155	0.103	0.8815	55.5268	13.2204	2
80067984700	103	114	166	180	135	135	152	154	231	236	112	112	105	112	237	245	148	156	78	82	290	293	237	238	1860	SE-Sv	Sweden	Svedala	0.0166	0.0137	0.9697	55.5268	13.2204	2
80067984561	114	118	166	180	135	141	138	154	231	231	132	148	107	109	237	237	148	154	80	112	290	293	237	238	1864	SE-Si	Sweden	Silversborg	0.3707	0.2217	0.4076	55.4842	13.2526	2
80067984630	114	118	166	180	135	141	138	146	231	235	144	150	107	109	243	253	148	148	82	96	293	293	238	238	1864	SE-Si	Sweden	Silversborg	0.8217	0.1293	0.049	55.4842	13.2526	2
80067984703	112	114	180	180	135	141	138	138	231	231	130	150	105	107	247	249	148	154	112	114	290	290	242	244	1864	SE-Si	Sweden	Silversborg	0.9585	0.0189	0.0226	55.4842	13.2526	2
80067984712	116	116	180	180	124	124	138	160	231	231	148	148	105	107	237	253	148	162	78	94	290	290	237	238	1866	SE-An	Sweden	Anderslöv	0.015	0.0329	0.9521	55.4325	13.3171	2
80067984660	112	112	166	180	124	133	136	138	231	236	112	112	105	112	237	245	148	156	78	106	290	290	238	238	1868	SE-Sv	Sweden	Svedala	0.0527	0.047	0.9003	55.5268	13.2204	2
80067984557	116	116	166	180	124	128	138	154	235	235	136	148	105	109	237	253	148	154	104	106	290	290	238	238	1870	SE-To	Sweden	Torup	0.0319	0.256	0.7121	55.5643	13.2115	2
80067984642	124	124	166	180	128	137	152	152	235	235	150	166	105	107	237	243	148	148	86	110	296	296	237	238	1870	SE-Lu	Sweden	Lund	0.0213	0.9666	0.0121	55.6995	13.1973	2
80067984648	124	124	166	180	150	150	152	152	231	231	132	138	105	112	245	247	148	154	68	92	290	290	238	244	1870	SE-Lu	Sweden	Lund	0.0213	0.9624	0.0163	55.6995	13.1973	2
80067984623	112	116	166	180	135	135	138	144	231	235	150	150	105	105	247	249	148	154	112	114	290	290	242	244	1872	SE-Si	Sweden	Silversborg	0.9679	0.0166	0.0155	55.4842	13.2526	2
80067984622	114	114	166	180	135	141	140	140	231	235	144	150	107	109	237	245	148	156	78	82	290	293	237	238	1881	SE-Si	Sweden	Silversborg	0.945	0.0154	0.0396	55.4842	13.2526	2
80067984659	116	116	180	180	139	141	138	149	236	236	104	104	105	107	237	245	148	156	78	82	290	293	237	238	1881	SE-He	Sweden	Helsingborg	0.0124	0.0577	0.9299	56.0523	12.7607	2
80067984662	112	112	166	180	135	135	138	154	236	236	112	112	107	107	245	249	150	156	86	94	290	293	236	238	1881	SE-Sv	Sweden	Svedala	0.0174	0.0126	0.97	55.5268	13.2204	2
80067984553	112	112	180	180	133	152	146	146	231	231	114	132	105	105	237	249	148	156	78	82	290	293	237	238	1883	SE-Ma	Sweden	Malmö	0.0824	0.4087	0.5089	55.5721	13.0764	2
80067984558	112	118	166	180	128	137	152	152	231	231	150	166	105	109	245	247	148	154	88	126	296	296	237	238	1883	SE-Lu	Sweden	Lund	0.0321	0.9548	0.0131	55.6995	13.1973	3
80067984547	126	126	166	180	137	147	142	142	231	231	150	150	105	112	247	255	148	156	112	114	293	293	237	238	1884	SE-Si	Sweden	Silversborg	0.7242	0.2652	0.0106	55.4842	13.2526	3
80067984554	114	122	180	180	124	124	152	154	231	235	0	0	105	105	237	249	154	156	112	114	290	290	242	244	1886	SE-Si	Sweden	Silversborg	0.2511	0.7019	0.047	55.4842	13.2526	3
80067984560	116	116	166	180	126	133	142	142	231	231	150	150	109	109	247	249	148	154	112	114	290	290	242	244	1886	SE-Si	Sweden	Silversborg	0.9795	0.0116	0.0089	55.4842	13.2526	3
80067984566	116	116	166	180	128	130	138	149	231	231	114	148	105	112	237	245	148	154	96	110	290	290	237	237	1886	SE-He	Sweden	Helsingborg	0.0604	0.7878	0.1518	56.0523	12.7607	3
80067984621	112	112	166	180	124	135	152	154	231	235	132	148	113	114	239	257	148	156	78	114	290	293	237	253	1886	SE-Si	Sweden	Silversborg	0.4542	0.2417	0.3041	55.4842	13.2526	3
80067984628	124	129	166	180	128	133	138	146	231	231	112	144	113	114	239	257	148	156	78	114	290	290	242	244	1886	SE-Si	Sweden	Silversborg	0.9785	0.0139	0.0076	55.4842	13.2526	3
80067984638	124	129	166	180	128	133	138	146	231	231	112	144	105	107	243	251	148	148	78	78	290	290	242	244	1886	SE-Si	Sweden	Silversborg	0.9566	0.0307	0.0127	55.4842	13.2526	3
80067984646	112	114	166	180	124	135	152	154	231	235	132	148	105	109	237	245	148	156	78	82	290	293	237	238	1886	SE-An	Sweden	Anderslöv	0.0179	0.0172	0.9649	55.4325	13.3171	3
80067984677	116	126	166	180	124	135	146	154	236	236	132	148	105	105	241	257	148	148	98	114	293	293	242	244	1886	SE-He	Sweden	Helsingborg	0.0595	0.8658	0.0747	56.0523	12.7607	3
80067984704	114	114	166	180	124	130	140	140	231	235	150	150	105	107	249	253	150	162	78	82	290	290	237	238	1886	SE-Si	Sweden	Silversborg	0.8699	0.0193	0.1108	55.4842	13.2526	3
80067984679	116	116	166	180	124	124	138	138	231	235	104	104	105	107	249	253	148	162	86	94	293	293	236	238	1887	SE-He	Sweden	Helsingborg	0.0122	0.035	0.9528	56.0523	12.7607	3
80067984559	112	112	166	180	135	155	138	142	231	231	112	148	107	109	237	237	148	156	80	112	290	290	238	238	1888	SE-Me	Sweden	Markie	0.8742	0.0189	0.1068	55.4369	13.2815	3
80067984624	112	116	180	180	124	135	144	150	231	231	132	148	109	109	237	253	148	162	78	94	290	290	237	238	1888	SE-Me	Sweden	Markie	0.0246	0.0245	0.9509	55.4369	13.2815	3
80067984633	103	114	166	180	124	135	152	154	231	235	120	120	105	105	237	243	142	148	68	86	290	293	240	240	1891	SE-Nä	Sweden	Näsbyholm	0.0134	0.7682	0.2184	55.4663	13.4609	3
80067984645	112	116	180	180	124	135	152	154	231	231	110	110	105	112	237	245	148	156	92	92	290	290	237	238	1891	SE-Ra	Sweden	Ramdala	0.0123	0.1405	0.8472	55.9733	12.9424	3
80067984713	112	116	166	180	126	126	138	152	231	231	120	120	105	109	237	253	148	162	78	94	290	290	237	238	1891	SE-Ra	Sweden	Ramdala	0.0892	0.1249	0.7859	55.9733	12.9424	3
80067984714	116	116	183	183	135	135	152	154	231	231	110	110	105	109	237	245	148	156	78	82	290	293	237	238	1891	SE-Ra	Sweden	Ramdala	0.028	0.0474	0.9246	55.9733	12.9424	3
80067984555	108	116	166	180	139	141	150	157	236	236	114	148	111	111	253	253	154	154	92	96	293	293	242	244	1894	SE-He	Sweden	Helsingborg	0.0142	0.9573	0.0285	56.0523	12.7607	3
80067984564	116	116	166	180	128	130	138	146	231	235	112	114	105	115	241	257	148	148	84	112	293	293	237	238	1894	SE-He	Sweden	Helsingborg	0.0753	0.8773	0.0474	56.0523	12.7607	3
80067984576	112	114	180	180	124	124	138	142	231	231	112	144	105	107	237	247	156	156	96	114	290	290	242	244	1894	SE-Si	Sweden	Silversborg	0.9668	0.014	0.0192	55.4842	13.2526	4
80067984644	114	116	166	180	124	135	138	138	231	235	104	104	111	111	237	245	148	156	92	106	296	296	234	238	1894	SE-He	Sweden	Helsingborg	0.0168	0.7623	0.2209	56.0523	12.7607	4
80067984673	116	116	180	180	124	124	138	149	231	231	114	148	107	107	249	253	148	148	68	78	293	293	237	238	1894	SE-He	Sweden	Helsingborg	0.0172	0.053	0.9298	56.0523	12.7607	4
80067984715	116	116	180	180	128	130	138	150	235	236	112	150	105	112	241	257	148	148	86	94	293	293	236	238	1894	SE-He	Sweden	Helsingborg	0.1363	0.5552	0.3085	56.0523	12.7607	4
80067984655	114	118	166	180	135	141	142	142	231	231	112	144	113	114	239	257	148	148	86	86	290	290	242	244	1895	SE-Si	Sweden	Silversborg	0.9678	0.0156	0.0166	55.4842	13.2526	4
80067984657	116	129	180	180	124	135	138	154	231	235	130	132	105	112	237	245	148	156	78	82	290	293	237	238	1895	SE-Si	Sweden	Silversborg	0.0421	0.0325	0.9254	55.4842	13.2526	4
80067984656	116	116	166	180	157	157	144	149	231	231	124	128	107	107	237	249	148	156	94	94	293	293	237	237	1896	SE-Ma	Sweden	Malmö	0.0139	0.7526	0.2335	55.5721	13.0764	4
80067984609	114	114	180	180	136	136	152	154	235	235	112	112	107	109	237	245	148	156	78	82	290	293	237	238	1897	SE-Sm	Sweden	Smedstorp	0.0553	0.0389	0.9058	55.5481	14.1211	4
80067984640	112	114	180	180	139	141	138	149	231	231	114	148	105	112	237	245	148	162	78	82	290	293	237	238	1898	SE-He	Sweden	Helsingborg	0.02	0.031	0.949	56.0523	12.7607	4
80067984716	116	116	166	166	124	124	138	138	231	235	128	138	107	107	249	253	148	156	78	82	290	293	237	238	1898	SE-He	Sweden	Helsingborg	0.1455	0.1789	0.6756	56.0523	12.7607	4
80067984565	114	114	166	180	126	135	140	140	231	231	114	150	107	107	249	249	156	156	80	106	290	290	238	238	1900	SE-Sv	Sweden	Svedala	0.9192	0.02	0.0608	55.5268	13.2204	4
80067984567	110	126	166	180	135	135	138	142	231	236	112	112	105	119	245	249	150	156	86	86	290	293	236	238	1900	SE-Sv	Sweden	Svedala	0.2056	0.1147	0.6797	55.5268	13.2204	4
80067984563	103	116	180	180	126	137	146	152	231	231	110	148	105	115	237	237	148	154	112	114	293	293	238	238	1906	SE-Nä	Sweden	Näsbyholm	0.0529	0.8215	0.1256	55.4663	13.4609	4
80067984590	112	114	166	180	135	155	142	142	231	231	112	148	105	107	255	259	154	156	78	112	290	290	238	242	1907	SE-Si	Sweden	Silversborg	0.9596	0.0199	0.0205	55.4842	13.2526	4
80067984616	116	129	180	180	124	135	149	161	231	235	130	133	112	112	239	257	148	156	78	114	290	293	238	244	1907	SE-Si	Sweden	Silversborg	0.3637	0.5367	0.0996	55.4842	13.2526	4
80067984620	108	116	180	180	135	141	152	152	231	231	108	126	105	105	249	253	150	162	112	114	290	293	237	238	1907	SE-Si	Sweden	Silversborg	0.1259	0.6553	0.2188	55.4842	13.2526	4
80067984665	114	116	166	166	124	126	140	152	231	231	108	138	105	109	237	245	148	156	78	82	290	293	237	238	1907	SE-Si	Sweden	Silversborg	0.6553	0.1292	0.2155	55.4842	13.2526	4
80067984705	114	116	166	180	135	141	138	154	231	231	146	161	105	105	237	249	154	156	78	82	290	293	237	238	1907	SE-Si	Sweden	Silversborg	0.1533	0.1177	0.7291	55.4842	13.2526	4
80067984706	114	116	180	180	124	135	140	152	231	231	146	150	105	109	237	245	148	156	78	82	290	293	237	238	1907	SE-Si	Sweden	Silversborg	0.497	0.061	0.442	55.4842	13.2526	4
80067984682	116	120	180	180	124	135	152	152	231	235	130	161	113	114	237	245	148	156	92	92	290	293	238	244	1908	SE-Nä	Sweden	Näsbyholm	0.144	0.6867	0.1693	55.4663	13.4609	4
80067984649	116	116	180	180	139	141	138	149	231	231	114	148	105	112	237	237	148	170	94	96	290	290	237	237	1910	SE-He	Sweden	Helsingborg	0.0221	0.2541	0.7238	56.0523	12.7607	5
80067984619	110	116	180	180	126	126	152	152	231	231	108	138	105	112	247	249	148	154	112	114	290	290	242	244	1911	SE-Si	Sweden	Silversborg	0.5963	0.3738	0.0299	55.4842	13.2526	5
80067984635	112	116	166	166	124	135	142	144	231	231	124	128	107	107	237	257	148	156	82	98	293	293	237	237	1911	SE-Ma	Sweden	Malmö	0.2046	0.6582	0.1372	55.5721	13.0764	5
80067984608	114	120	166	180	124	124	150	152	231	235	112	144	105	105	237	245	148	156	78	82	290	293	237	238	1912	SE-Åh	Sweden	Åhus	0.2435	0.1468	0.6097	55.9203	14.2575	5
80067984578	112	129	166	180	124	135	138	150	231	231	112	144	105	107	237	241	148	156	78	78	290	293	238	242	1915	SE-Si	Sweden	Silversborg	0.8445	0.035	0.1205	55.4842	13.2526	5
80067984618	114	116	180	180	124	137	144	152	231	235	144	150	105	109	237	245	148	156	78	82	290	293	242	244	1915	SE-Si	Sweden	Silversborg	0.8358	0.0719	0.0923	55.4842	13.2526	5
80067984639	114	116	166	166	124	124	146	154	231	231	128	130	105	112	239	247	148	148	90	106	293	293	236	238	1917	SE-St	Sweden	Stångby	0.0612	0.6843	0.2545	55.7547	13.206	5
80067984546	124	124	166	180	128	137	144	152	235	235	132	138	105	107	243	241	148	148	94	100	296	296	238	244	1918	SE-Lu	Sweden	Lund	0.0133	0.9767	0.01	55.6995	13.1973	5
80067984631	114	114	180	180	124	135	152	152	231	231	114	132	105	107	243	253	148	148	78	102	290	290	237	238	1918	SE-Es	Sweden	Eslöv	0.0288	0.042	0.9292	55.8522	13.2845	5
80067984571	112	129	166	180	124	135	138	142	0	0	112	114	107	109	239	239	148	148	80	112	287	287	238	244	1922	SE-So	Sweden	Stävesjö	0.9134	0.0678	0.0188	55.4587	13.3281	5
80067984613	112	116	178	180	124	124	138	154	231	231	132	132	107	109	249	253	150	162	86	94	290	293	236	238	1922	SE-An	Sweden	Anderslöv	0.0108	0.0196	0.9696	55.4325	13.3171	5
80067984617	114	114	166	180	130	130	138	144	231	235	150	150	105	109	239	257	148	156	78	114	290	293	238	244	1922	SE-Si	Sweden	Silversborg	0.9752	0.0133	0.0115	55.4842	13.2526	5
80067984707	114	114	166	180	124	124	140	140	231	231	102	112	105	107	247	249	148	154	112	114	290	290	242	244	1922	SE-Si	Sweden	Silversborg	0.9601	0.0277	0.0122	55.4842	13.2526	5
80067984586	112	112	166	180	124	135	138	150	231	235	144	144	105	107	239	257	148	156	78	114	290	293	238	244	1924	SE-Si	Sweden	Silversborg	0.9506	0.019	0.0304	55.4842	13.2526	5
80067984641	112	112	180	180	135	135	138	138	231	235	132	148	105	105	237	239	148	156	78	78	290	293	237	237	1924	SE-Kp	Sweden	Krapperup	0.061	0.0154	0.9236	56.2499	12.5335	5
80067984719	112	112	180	180	135	141	150	150	231	235	112	148	105	107	237	239	148	162	78	114	290	293	237	238	1924	SE-Sk	Sweden	Kragerup [?] Skåne	0.3396	0.0335	0.6269	55.5092	11.3792	5
80067984634	110	116	166	180	124	135	152	154	235	235	114	132	107	107	239	259	142	150	100	110	290	293	238	244	1926	SE-Ss	Sweden	Södra Sandby	0.0328	0.8992	0.068	55.7107	13.3482	5
80067984643	116	116	180	180	124	124	138	150	236	236	132	148	107	107	253	253	148	156	84	112	293	293	237	238	1926	SE-He	Sweden	Helsingborg	0.0217	0.3248	0.6535	56.0523	12.7607	5
80067984651	112	114	166	180	124	124	146	152	231	231	114	132	105	109	249	253	150	162	88	104	290	293	236	238	1928	SE-St	Sweden	Stångby	0.019	0.2306	0.7504	55.7547	13.206	5
80067984632	112	114	166	180	150	150	152	152	235	235	132	138	107	112	237	237	142	148	82	96	290	293	237	238	1932	SE-Lu	Sweden	Lund	0.0194	0.9255	0.0551	55.6995	13.1973	5
80067984583	103	114	166	180	126	135	150	154	231	236	112	112	105	112	237	245	148	156	78	82	290	293	237	238	1933	SE-Sv	Sweden	Svedala	0.0459	0.0248	0.9293	55.5268	13.2204	6
80067984652	112	112	166	180	135	155	138	152	231	235	130	161	105	105	253	253	148	156	78	114	290	293	237	237	1934	SE-No	Sweden	Nordanå	0.1656	0.0861	0.7483	55.6233	13.1226	6
80067984615	112	116	166	166	124	124	149	154	231	231	114	132	105	115	237	245	148	156	78	82	290	293	237	238	1935	SE-Mm	Sweden	Maglehem	0.0161	0.0799	0.904	55.7713	14.1558	6
80067984650	116	116	166	166	124	124	152	154	231	235	132	148	109	109	245	249	150	156	68	80	293	293	237	238	1940	SE-Gv	Sweden	Görslöv	0.0207	0.1112	0.8681	55.6293	13.1456	6
80067984569	110	110	166	180	133	152	136	138	231	231	140	146	103	109	237	249	154	156	112	114	293	293	238	238	1942	SE-Si	Sweden	Silversborg	0.0546	0.9171	0.0283	55.4842	13.2526	6
80067984708	112	114	166	180	135	137	138	140	231	231	150	150	107	112	237	245	148	156	78	114	0	0	242	244	1942	SE-Si	Sweden	Silversborg	0.9602	0.0239	0.0159	55.4842	13.2526	6
80067984614	103	116	180	180	124	130	150	152	231	231	128	130	105	105	245	249	150	156	86	94	293	293	236	238	1945	SE-Kr	Sweden	Kristianstad	0.0285	0.2856	0.6859	56.0236	14.1635	6
80067984570	112	116	180	180	128	139	146	154	231	231	124	150	105	107	237	249	148	156	84	112	293	293	237	238	1947	SE-Pe	Sweden	Helsingborg, Pålsjö	0.0588	0.8628	0.0784	56.0523	12.7607	6
80067984680	108	112	166	180	124	145	152	154	231	235	130	132	105	109	237	247	148	156	88	126	285	290	237	237	1947	SE-Lu	Sweden	Lund	0.0134	0.9382	0.0484	55.6995	13.1973	6
80067984610	112	116	180	180	128	137	144	152	231	235	132	138	105	112	237	243	148	148	88	126	285	290	238	244	1948	SE-Lu	Sweden	Lund	0.0175	0.9634	0.0191	55.6995	13.1973	6
80067984636	102	102	166	180	135	141	138	146	235	235	102	132	119	119	243	243	148	154	92	92	290	293	237	237	1948	SE-Sm	Sweden	Svaneholm	0.0175	0.9553	0.0272	55.5006	13.4789	6
80067984718	112	129	166	180	128	128	138	138	231	235	132	138	105	107	235	235	148	150	126	126	285	296	237	238	1948	SE-Lu	Sweden	Lund	0.0232	0.9609	0.0159	55.6995	13.1973	6
80067984545	108	112	180	180	124	141	154	154	231	231	110	146	105	112	237	237	142	148	88	126	285	290	238	244	1949	SE-Lu	Sweden	Lund	0.0137	0.9142	0.0721	55.6995	13.1973	6
80067984637	112	114	166	180	135	135	152	154	235	236	136	136	105	105	245	253	150	156	78	100	290	293	236	238	1951	SE-De	Sweden	Degeberga	0.0121	0.0461	0.9418	55.8365	14.0819	6
80067984556	114	116	166	183	130	130	138	140	231	231	144	150	113	114	237	237	148	154	96	96	293	293	238	238	1956	SE-Si	Sweden	Silversborg	0.9079	0.068	0.0241	55.4842	13.2526	6
80067984585	126	126	166	180	137	147	149	150	236	236	153	159	119	119	237	249	154	156	112	114	293	293	238	238	1958	SE-Si	Sweden	Silversborg	0.0261	0.956	0.0179	55.4842	13.2526	6
80067984653	126	126	166	180			138	146	231	235	144	150	105	112	237	249	154	156	82	96	293	293	238	238	1958	SE-Si	Sweden	Silversborg	0.4629	0.5201	0.017	55.4842	13.2526	6
80067984669	114	114	180	180	124	135	152	154	231	235	132	148	105	112	241	249	148	148	80	106	290	290	237	238	1959	SE-Si	Sweden	Silversborg	0.0373	0.0668	0.8959	55.4842	13.2526	6
80067984544	112	116	166	180	128	133	138	146	231	235	130	144	105	105	237	253	150	150	80	114	293	293	237	237	1965	SE-Si	Sweden	Silversborg	0.3907	0.353	0.2562	55.4842	13.2525	6
80067984625	114	116	166	180	124	135	138	140	231	231	144	150	105	109	237	245	148	156	78	82	290	293	237	238	1974	SE-Si	Sweden	Silversborg	0.8432	0.0195	0.1373	55.4842	13.2526	6
80067984675	110	116	180	180	124	135	152	152	231	231	114	132	105	112	237	253	148	162	78	94	290	290	237	238	1996	SE-Ky	Sweden	Kyrkheddinge	0.0104	0.0238	0.9658			7
80067984674	112	116	166	180	124	128	146	149	231	231	138	150	105	105	249	253	150	162	88	114	290	290	237	238	1998	SE-By	Sweden	Brunnby	0.1787	0.6282	0.1931			7
90311017	112	112	166	180	124	124	146	146	235	235	99	99	112	112	253	265	154	156	86	94	290	293	237	240	2020	SE-Sv	Sweden	Svalöv, Källs-Nöbbelöv	0.0118	0.9445	0.0437			7
90311178	112	112	180	180	133	133	149	149	231	235	148	148	105	112	237	257	148	156	94	94	290	293	238	238	2020	SE-Ha	Sweden	Lomma, Habo ljung	0.0421	0.1505	0.8074			7
90311185	110	114	166	166	124	124	146	146	231	231	140	148	112	112	237	255	148	162	94	102	290	293	238	238	2020	SE-Ha	Sweden	Lomma, Habo ljung	0.0264	0.8431	0.1305			7
90311215	112	118	166	180	124	128	146	150	231	235	112	148	109	109	255	257	156	162	82	112	290	293	237	244	2020	SE-Ma	Sweden	Malmö, Bunkeflo, Brofästet	0.6337	0.3076	0.0587			7
90311222	112	116	166	166	143	145	146	146	231	231	132	132	109	112	237	257	148	154	78	96	290	290	237	244	2020	SE-Bu	Sweden	Burlöv, Stjärnelundsvägen	0.0705	0.8942	0.0353			7
90311284	116	118	0	0	128	128	146	149	231	235	148	153	105	105	237	245	148	148	82	88	290	293	238	244	2020	SE-Lj	Sweden	Vellinge, Höllviken, Räng, Ljunghusen	0.0218	0.951	0.0272			7
90311338	114	118	166	180	124	158	146	152	231	235	140	163	105	105	237	237	148	156	92	100	293	293	237	238	2020	SE-Lu	Sweden	Lund, S:t Hans, Klosterängshöjden	0.0136	0.9618	0.0246			7
90311383	112	118	180	180	143	143	149	150	231	231	132	157	105	107	237	237	156	156	82	96	290	290	237	240	2020	SE-Og	Sweden	Vellinge, Östra Grevie	0.0255	0.9259	0.0486			7
90311437	110	116	166	166	137	137	144	146	231	231	144	144	105	105	259	263	156	156	94	112	290	293	237	238	2020	SE-Sk	Sweden	Skurup, Stjärneholm	0.2583	0.7205	0.0212			7
90313080	116	116	166	180	124	124	146	150	231	231	112	148	105	105	257	259	154	156	100	106	290	290	240	240	2020	SE-Sv	Sweden	Svalöv, Norrvidinge	0.0536	0.8736	0.0728			7
90313165	114	118	166	166	124	150	150	150	231	235	112	163	105	112	237	245	148	162	84	126	293	293	238	238	2020	SE-Ma	Sweden	Malmö, Norregatan	0.0258	0.9091	0.0651			7
90313189	114	114	166	180	145	145	146	161	231	231	163	174	105	112	237	239	148	156	94	94	293	293	237	237	2020	SE-Ma	Sweden	Malmö, Norregatan	0.0181	0.9499	0.032			7
90313202	112	112	166	180	124	137	146	161	231	236	99	99	105	107	235	241	148	156	78	82	290	293	237	240	2020	SE-Ma	Sweden	Malmö, Kungsparken, grottan	0.0246	0.9262	0.0492			7
90313240	114	116	166	180	124	124	144	146	231	235	148	150	105	105	237	245	154	156	88	100	290	290	238	238	2020	SE-So	Sweden	Kävlinge, Södervidinge	0.1399	0.7309	0.1292			7
90313332	116	126	166	180	124	148	146	150	231	236	140	148	105	109	239	257	148	156	94	102	285	290	237	240	2020	SE-Lo	Sweden	Lomma, kanalen	0.0173	0.946	0.0367			7
90313363	112	114	180	180	124	124	146	150	231	236	99	132	105	112	243	247	148	148	112	112	290	293	240	242	2020	SE-Ka	Sweden	Kävlinge, Lilla Harrie, valskvarnen	0.0582	0.9148	0.027			7
90313509	112	114	166	180	124	128	144	146	231	231	150	150	105	105	237	263	154	154	90	114	290	290	238	244	2020	SE-Lu	Sweden	Lund, Stora Råby, utkast	0.6629	0.3233	0.0138			7
90313554	112	112	180	180	148	150	146	146	231	231	132	132	109	112	245	249	154	156	94	104	290	293	238	238	2020	SE-Kr	Sweden	Kristianstad, Maglehem, Blåherremölla	0.019	0.8742	0.1068			7
[truncated: 30 more columns]
